# Supplementary material
Source: HighWire-hosted journal article supplement (https://bjsm.bmj.com/content/54/2/79)
Supplement: inline-supplementary-material-2 [file inline-supplementary-material-2.docx]

**Online Supplementary File 2**

**Description of Clinical Practice Guidelines**

| **Title** | **Year** | **Type of developer** | **First author (if applicable)** | **Country/Region of Origin** | **Format** | **Number of pages** | **Informed by CPG quality tool** | **Included CPG Methodologist** | **Accompanying documents accessed** |
| --- | --- | --- | --- | --- | --- | --- | --- | --- | --- |
| **Osteoarthritis** |  |  |  |  |  |  |  |  |  |
| AAOS – Knee OA 58 | 2013 | Medical Society | Jevsevar | USA | Report | 1234 | No | Yes | Methods document  Review comments |
| AAOS – Hip OA 59 | 2017 | Medical Society | n/a | USA | Report | 853 | No | Yes | No |
| ACR - OA of the Hand, Hip, and Knee 60 | 2012 | Medical Society | Hochberg | USA/Canada | Journal article | 10 | No | No | Article supplementary files |
| EULAR - hip and knee OA 36 | 2013 | Medical Society | Fernandes | International - Europe | Journal article | 11 | No | No | Supplements 1 and 2: propositions and literature searches, |
| ESCEO – Knee OA 61 | 2014 | Medical Society | Bruyere | International – Europe/USA | Journal article | 11 | No | No | Nil |
| ESCEO – Knee OA real world 62 | 2016 | Medical Society | Bruyere | International – Europe/USA | Journal article | 9 | No | No | Nil |
| KNGF - Physiotherapy hip/knee OA 63 | 2011 (update) | Medical Society | Peter | Netherlands | Journal article | 13 | No | No | Nil |
| MaHTAS – OA 43 | 2013 | Government | Rosman | Malaysia | Report | 52 | No | Yes | Nil |
| NICE – OA 45 | 2014 | Government | N/A | UK | Report | 505 | No | Yes | Appendices, development materials |
| OARSI – knee OA 42 | 2014 | Medical Society | McAlindon | International – Europe/UK/USA/Canada/Japan | Journal article | 26 | No | Yes | Bibliography |
| Ottawa – OA Obese/Overweight 64 | 2011 | Expert panel | Brosseau | Canada | Journal article | 19 | Yes – AGREE criteria | Yes | eAppendix |
| Ottawa - patient education OA 65 | 2011 | Expert Panel | Brosseau | Canada/USA | Journal article | 41 | Yes - AGREE | Yes | Nil |
| Ottawa – Hip OA 66 | 2016 | Expert Panel | Brosseau | International – Canada/Spain/Australia/France | Journal article | 12 |  | Yes | Appendices, Supplementary tables and figures |
| VA/DoD - Hip & Knee OA 67 | 2014 | Government | Goodman | USA | Report | 126 | No | Yes | Nil |
| **Low Back Pain** |  |  |  |  |  |  |  |  |  |
| ACP – low back pain 68 | 2017 | Medical Society | Qaseem | USA | Journal article | 17 | No | yes | Appendix 1-4  Report: Noninvasive treatments for low back pain 69  Article: Ann Intern Med 2010;153(3):194 |
| APTA – low back pain 70 | 2012 | Medical Society | Delitto | USA | Journal article | 57 | No | Yes | Patient summary |
| Belgium – low back pain 38 | 2017 | Government | Van Wambeke | Belgium | Report | 160 | Yes | Yes | Algorythm 1  Supplement  Synthesis |
| CCGPP – LBP 37 | 2016 | Medical Society | Globe | USA | Journal article | 22 | Yes - AGREE | No | Nil |
| BPS – low back pain/radicular pain 71 | 2013 | Medical Society | Lee | International – Cayman Islands/UK | Journal article | 9 | No | Yes | Appendix A & B: methodology, working group members, references, contributors |
| Cheng et al – low back pain 72. | 2012 | Other | Cheng | Hong Kong | Journal article (online) | N/A | No | Yes “expertise in guideline development” | Nil |
| Colorado DLE WC – LBP 73 | 2014 | Government | N/A | USA | Report | 117 | Yes – AGREE II | No | Criteria for article review, general guideline methods, literature search strategies, evidence summary, |
| Danish low back pain 40 | 2017 | Government | Stochkendahl | Denmark | Article | 16 | No | Yes | Nil |
| ICSI – LBP 74 | 2012 | Other | Goertz | USA | Report | 91 | No | No | ICSI Scientific Document Overview |
| NASS - Lumbar Disc Herniation with Radiculopathy 75 | 2012 | Medical Society | Kreiner | USA | Report | 98 | No | No | Technical report |
| NASS - Degenerative Lumbar Spinal Stenosis 76 | 2011 (revised) | Medical Society | Kreiner | USA | Report | 104 | No | No | Technical report |
| NASS - Degenerative Lumbar Spondylolisthesis 77 | 2014 (revised) | Medical Society | Matz | USA | Report | 121 | No | No | Technical report |
| NICE – LBP and sciatica in over 16s 35 | 2016 | Government | N/A | UK | Report | 816 | No | Yes | Appendices, Online development materials |
| PARM – low back pain 44 | 2012 | Medical society | N/A | Philippines | Report | 103 | No | No | Nil |
| TOP – LBP 78 | 2015 | Other | N/A | Canada | Report | 49 | No | No | Nil |
| **Shoulder** |  |  |  |  |  |  |  |  |  |
| Colorado DLE WC – shoulder 79 | 2015 | Government | N/A | USA | Report | 164 | Yes – AGREE II | No | Criteria for article review, general guideline methods, literature search strategies, evidence summary, article appraisal |
| DOA - Subacromial pain 80 | 2014 | Medical Society | Diercks | Netherlands | Journal article | 9 | No | No | Nil |
| Eubank et al - Rotator cuff 81 | 2016 | Research Collaboration | Eubank | Canada | Journal article | 15 | No | No | Additional file 1 |
| Hopman et al - Rotator Cuff 41 | 2013 | Research Collaboration | Hopman | Australia | Report | 84 | Yes – AGREE II and NHMRC | Yes | Technical report |
| I.S.Mu.L.T - Rotator Cuff Tears 82 | I.S.Mu.L.T | Medical Society | Oliva | International – Europe/Tunisia | Journal article | 38 | No | No | Nil |
| WSDL & I – Shoulder 83 | 2013 | Government | Howe | USA | Report | 28 | No | No | Guideline process document |
| **Neck** |  |  |  |  |  |  |  |  |  |
| CCA – Neck pain 84 | 2014 | Medical Society | Bryans | Canada | Journal article | 22 | Yes – AGREE instrument | No | Journal article – J Can Chiro Assoc 2004; 48(1) |
| CCGI – Neck pain-associated and whiplash-associated disorders 33 | 2016 | Medical Society | Bussieres | Canada | Journal article | 42 | Yes – AGREE II | Yes | Appendix 1-7 |
| Colorado DLE WC - Cervical Spine Injury 85 | 2014 | Government | N/A | USA | Report | 101 | Yes – AGREE II | No | Evidence summaries, article appraisal criteria, article appraisals |
| OPTIMa – Neck pain 34 | 2016 | Expert Panel | Cote | Canada | Journal article | 23 | No | No | Appendix I-IV |
| SIMFER - neck pain 86 | 2013 | Medical Society | Monitcone | Italy | Journal article | 16 | No | No | Nil |
| **Cervical and thoracic spine** |  |  |  |  |  |  |  |  |  |
| ACOEM – Cervical and thoracic spine 87 | 2016 | Medical Society | Hegmann | USA | Report | 711 | No | Yes |  |
| **Knee** |  |  |  |  |  |  |  |  |  |
| Barton et al* – P-F Pain 88 | 2015 | Research collaboration | Barton | International – UK/Australia | Journal article | 13 | No | No | 4 supplementary data files |
| **Musculoskeletal** |  |  |  |  |  |  |  |  |  |
| ACE - Musculoskeletal Injuries 89 | 2013 (update) | Medical Society | Braddock | USA | Report | 70 | No | No | Nil |
| **Lower Limb** |  |  |  |  |  |  |  |  |  |
| Colorado DLE WC – lower extremity 90 | 2016 | Government | N/A | USA | Report | 264 | Yes – AGREE II | No | Criteria for article review, general guideline methods, literature search strategies, evidence summary, article appraisal, RCT, systematic review and meta-analysis quality criteria |

*First author given where there is no stated organisation; AAOS - American Academy of Orthopedic Surgeons; ACP – American College of Physicians; ACR - American College of Rheumatology; CCGI - Canadian Chiropractic Guideline Initiative; EULAR - European League Against Rheumatism; ESCEO - European Society for Clinical and Economic Aspects of Osteoporosis and Osteoarthritis; KNGF - Royal Dutch Society of Physiotherapy; MaHTAS - Malaysia Health Technology Assessment Section Medical Development Division, Ministry of Health; NICE - National Institute for Health and Care Excellence; OARSI - Osteoarthritis Research Society International; Ottawa – Ottawa Panel; VA/DOD - Department of Veterans Affairs and the Department of Defence; APTA – Orthopaedic Section of the American Physical Therapy Association; CCGPP - Council on Chiropractic Guidelines and Practice Parameters; BPS - British Pain Society; Colorado DLE WC – Colorado Department of Labour and Employment Workers Compensation; ICSI - Institute for Clinical Systems Improvement; NASS - North American Spine Society; PARM - Philippine Academy of Rehabilitation Medicine; TOP - Toward Optimized Practice; DOA - Dutch Orthopaedic Association; I.S.Mu.L.T - Italian Society of Muscle Ligaments and Tendons; WSDL & I - Washington State Department of Labor and Industries; CCA - Canadian Chiropractic Association; OPTIMa –Ontario Protocol for Traffic Injury Management Collaboration; SIMFER - the Italian Society of Physical and Rehabilitation Medicine; ACOEM - American College of Occupational and Environmental Medicine; P-F – patellofemoral; ACE – Academy for Chiropractic Education.
